1 **Wheat *VRN1*, *FUL2* and *FUL3* play critical and redundant roles in spikelet development**  
2 **and spike determinacy**

3  
4 Chengxia Li<sup>1,2\*</sup>, Huiqiong Lin<sup>1,2\*</sup>, Andrew Chen<sup>1,3</sup>, Meiyee Lau<sup>1</sup>, Judy Jernstedt<sup>1</sup> and Jorge  
5 Dubcovsky<sup>1,2†</sup>

6 \* These authors contributed equally to this work

7 <sup>1</sup>Department of Plant Sciences, University of California, Davis, CA 95616, USA.

8 <sup>2</sup>Howard Hughes Medical Institute, Chevy Chase, MD 20815, USA.

9 <sup>3</sup>Current address: University of Queensland, Brisbane, QLD4072, Australia

10 <sup>†</sup> Author for correspondence: [jdubcovsky@ucdavis.edu](mailto:jdubcovsky@ucdavis.edu). Phone: 530 752 5159

11

12 **Running title:** Wheat spikelet development

13

14 **Key words:** wheat, spike development, spikelet, meristem identity, MADS-box,

15

16 **Word count:** 6994 (6378 + 616 figure legends)

17 **SUMMARY STATEMENT**

18 The wheat MADS-box proteins VRN1, FUL2 and FUL3 play critical and overlapping roles in  
19 the development of spikelets, which are the basic unit of all grass inflorescences.

20 **ABSTRACT**

21 The spikelet is the basic unit of the grass inflorescence. In this study, we show that wheat  
22 MADS-box genes *VRN1*, *FUL2* and *FUL3* play critical and redundant roles in spikelet and spike  
23 development, and also affect flowering time and plant height. In the *vrn1ful2ful3*-null triple  
24 mutant, the inflorescence meristem formed a normal double-ridge structure, but then the lateral  
25 meristems generated vegetative tillers subtended by leaves instead of spikelets. These results  
26 suggest an essential role of these three genes in the determination of spikelet meristem identity  
27 and the suppression of the lower ridge. Inflorescence meristems of *vrn1ful2ful3*-null and  
28 *vrn1ful2*-null remained indeterminate and single *vrn1*-null and *ful2*-null mutants showed delayed  
29 formation of the terminal spikelet and increased number of spikelets per spike. Moreover, the  
30 *ful2*-null mutant showed more florets per spikelet, which together with a higher number of  
31 spikelets, resulted in a significant increase in the number of grains per spike in the field. Our  
32 results suggest that a better understanding of the mechanisms underlying wheat spikelet and  
33 spike development can inform future strategies to improve grain yield in wheat.

34

35

## 36 INTRODUCTION

37 The grass family (Poaceae) has approximately 10,000 species, including important food crops  
38 such as rice, maize, sorghum, barley, and wheat (Kellogg, 2001). The flowers of these species  
39 are organized in a unique and diagnostic structure called spikelet (literally “little spike”), which  
40 is a compact inflorescence developing within the larger inflorescence (Malcomber et al., 2006).  
41 A spikelet typically has two sterile bracts (called glumes) enclosing one or more florets. Each  
42 floret includes a carpel, 3 or 6 stamens and two modified scales (called lodicules), all subtended  
43 by two bract-like organs, the palea and the lemma (Preston et al., 2009).

44 Grass inflorescences have been described as a progressive acquisition of different meristem  
45 identities that begins with the transition of the vegetative shoot apical meristem (SAM) to an  
46 inflorescence meristem (IM). The IM generates lateral primary branch meristems (PBMs) and  
47 secondary branch meristems (SBM) that terminate into spikelet meristems (SMs), which  
48 generate glumes and lateral floral meristems (FMs) (McSteen et al., 2000). This model has been  
49 a useful phenomenological description but is too rigid to explain some grass branching mutants,  
50 so a more flexible model is emerging in which meristem fate is regulated by the genes expressed  
51 at discrete signal centers localized adjacent to the meristems (Whipple, 2017).

52 In wheat, shortening of the inflorescence branches results in spikelets attached directly to the  
53 central axis or rachis and the formation of a derived inflorescence, a spike, in which spikelets are  
54 arranged alternately in opposite vertical rows (a distichous pattern) (Kellogg et al., 2013). In the  
55 initial stage, the IM generates a double-ridge structure in which the lower ridges are suppressed  
56 and the upper ridges acquire SM identity and form spikelets. The number of spikelets per spike is  
57 determined by the number of lateral meristems formed before the transition of the IM into a SM  
58 to form the terminal spikelet. In wheat, the growth of the spike is determinate, but the growth of  
59 each spikelet is indeterminate, with each SM initiating a variable number of FMs (Ciaffi et al.,  
60 2011). The numbers of spikelets per spike and florets per spikelet determine the maximum  
61 number of grains per spike and are important components of wheat grain yield potential.

62 Studies in *Arabidopsis*, which has a simpler inflorescence than grasses (Malcomber et al., 2006),  
63 have shown that MIKC-type MADS-box transcription factors *APETALAI* (*API*),  
64 *CAULIFLOWER* (*CAL*) and *FRUITFULL* (*FUL*) are critical in the determination of floral  
65 meristem identity. In the triple *ap1calful* mutant, the IM is not able to produce flowers and

66 reiterates the development of leafy shoots (Ferrández et al., 2000). In rice, combined loss-of-  
67 function mutations in *OsMADS14* (ortholog of *VRN1*) and *OsMADS15* (ortholog of *FUL2*)  
68 resulted in inflorescences with leaf-like organs on top of the primary branches (Wu et al., 2017).  
69 Simultaneous knockdown of *OsMADS14*, *OsMADS15* and *OsMAD18* (ortholog of *FUL3*) in a  
70 *Ospap2* (a SEPALLATA subfamily MADS-box) mutant background eliminated the formation of  
71 primary branches, and resulted in the formation of lateral vegetative tillers subtended by leaves  
72 (Kobayashi et al., 2012).

73 MIKC-type MADS-box proteins have a highly conserved MADS DNA-binding domain, an  
74 Intervening (I) domain, a Keratin-like (K) domain, and a C-terminal domain. These proteins bind  
75 as dimers to DNA sequences named ‘CArG’ boxes, and organize in tetrameric complexes that  
76 can recognize different CArG boxes. The multimeric nature of these complexes generates a large  
77 number of combinatorial possibilities with different targets and functions (Honma and Goto,  
78 2001); (Theissen et al., 2016).

79 The closest homologs to the Arabidopsis MADS-box genes *API*, *CAL* and *FUL* in the grass  
80 lineage are *VERNALIZATION 1 (VRN1)*, *FUL2* and *FUL3*. A phylogenetic analysis of the  
81 proteins encoded by these genes (Fig. S1) indicates that the Arabidopsis and grass proteins have  
82 independent sub-functionalization stories (Preston and Kellogg, 2006). In the grass lineage, the  
83 *VRN1* and *FUL2* clades are closer to each other than to the *FUL3* clade (Preston and Kellogg,  
84 2006). Mutations causing large truncations in the proteins encoded by the two *VRN1* homeologs  
85 in tetraploid wheat delayed heading time, but did not alter spikelet morphology or the ability of  
86 flowers to form viable grains (Chen and Dubcovsky, 2012). Since *FUL2* and *FUL3* are the  
87 closest paralogs of *VRN1*, we hypothesized that they could have redundant spikelet and floral  
88 meristem identity functions.

89 In this study, we combined loss-of-function mutants for the two homeologs of *VRN1*, *FUL2* and  
90 *FUL3* to generate double- and triple-null mutants in the same tetraploid background.

91 Characterization of these mutants revealed that *VRN1*, *FUL2* and *FUL3* have overlapping roles  
92 in the regulation of flowering time and stem elongation and, more importantly, that they play  
93 critical and redundant roles in spikelet development, suppression of the lower ridge and spike  
94 determinacy. Individual *vrn1* and *ful2* mutants showed significant increases in the number of

95 spikelets and grains per spike, suggesting that manipulations of these genes may contribute to  
96 increasing wheat grain yield potential.

97

## 98 **RESULTS**

### 99 **Combination of loss-of-function mutations in *VRN1*, *FUL2* and *FUL3***

100 We identified point mutations in the A and B genome homeologs of *FUL2* and *FUL3* in an  
101 EMS-mutagenized population of the tetraploid spring wheat variety Kronos (Krasileva et al.,  
102 2017; Uauy et al., 2009). We selected mutations that generated premature stop codons or  
103 modified splice sites. The proteins encoded by these mutant alleles are predicted to have large  
104 deletions or complete truncations of the K and C domains (Fig. S2 and Material and Methods)  
105 and, therefore, are most likely not functional. We backcrossed each individual mutant two to  
106 three times into a Kronos *vrn-2* null background (Distelfeld et al., 2009b) to reduce background  
107 mutations. This genetic background was used to avoid the extremely late flowering of plants  
108 carrying the *vrn1*-null mutation in the presence of the functional *VRN2* flowering repressor  
109 (Chen and Dubcovsky, 2012). All mutants described in this study are in Kronos *vrn2*-null  
110 background, which is referred to as “Control” in all figures.

111 We intercrossed the A and B genome homeologs for each gene and selected plants homozygous  
112 for both mutations. For simplicity, mutants with loss-of-function mutations in both homeologs  
113 will be referred to as null mutants (e.g. *vrn1*-null). The *ful2*-null and *ful3*-null mutants were  
114 crossed with *vrn1*-null (Chen and Dubcovsky, 2012) to generate *vrn1ful2*-null and *vrn1ful3*-null  
115 mutants, which were intercrossed to generate all eight homozygous *VRN1*, *FUL2* and *FUL3*  
116 allele combinations including the triple *vrn1ful2ful3*-null mutant. These eight genotypes were  
117 analyzed for stem length (Fig. 1A) and number of leaves (Fig. 1B) using three-way factorial  
118 ANOVAs (Fig. 1C).

### 119 ***VRN1*, *FUL2* and *FUL3* loss-of-function mutations reduce stem elongation**

120 Since some mutant combinations lack real spikes, we determined final stem length from the base  
121 of the plant to the base of the spike (or spike-like structure) instead of total plant height. Plants  
122 carrying only the *ful3*-null mutation showed no significant reduction in stem length, but those  
123 carrying the *vrn1*-null or *ful2*-null mutations were 20% and 14% shorter than the control,

124 respectively (Fig. 1A). A three-way factorial ANOVA for stem length revealed highly significant  
125 effects for all three genes (Fig. 1C). All three double mutant combinations had shorter stems than  
126 predicted from combined additive effects of the individual mutations, which was reflected in  
127 significant synergistic interactions (Fig. 1C). Taken together, these results indicate that *VRN1*,  
128 *FUL2* and *FUL3* have redundant roles in the regulation of stem elongation, and that the effect of  
129 the individual genes is larger in the absence of the other paralogs.

### 130 ***VRN1*, *FUL2* and *FUL3* mutations delay flowering time**

131 Functional redundancy among *VRN1*, *FUL2* and *FUL3* was also observed for heading time. The  
132 *vrn1*-null mutant headed 37.5 d later than the control (Fig. 1D), but differences in heading time  
133 for the *ful2*-null, *ful3*-null and *ful2ful3*-null mutants in the presence of the strong *Vrn-A1* allele  
134 were non-significant (Fig. 1E). For the *vrn1ful2*-null and *vrn1ful2ful3*-null mutants, it was not  
135 possible to determine heading times accurately because they had short stems and abnormal  
136 spikes that interfere with normal ear emergence. Instead, we determined the final number of  
137 leaves (Fig. 1B) and the timing of the transition between the vegetative and double-ridge stages  
138 (Fig. S3).

139 A three-way factorial ANOVA for leaf number revealed highly significant effects for the three  
140 individual genes, as well as for all the two- and three-way interactions (Fig. 1C). The *vrn1*-null  
141 mutant had on average 14.4 leaves (59% > control, Fig. 1B), which was consistent with its later  
142 heading time (Fig. 1D). Similar leaf numbers were detected in *vrn1ful2*-null (14.3) and *vrn1ful3*-  
143 null (14.9), but the triple *vrn1ful2ful3*-null mutant had on average 17.7 leaves (Fig. 1B), which  
144 was consistent with the 9 to 12 d delay in the transition between the vegetative SAM and the  
145 double-ridge stage relative to the *vrn1*-null control (Fig. S3). These results indicate that *FUL3*  
146 has a residual ability to accelerate flowering time in the absence of *VRN1* and *FUL2*.

147 Transgenic Kronos plants overexpressing the coding regions of *FUL2* fused with a C-terminal  
148 3xHA tag (henceforth *Ubi::FUL2*, Fig. S4A, events #1 and #6) or *FUL3* fused with a C-terminal  
149 4xMYC tag (henceforth *Ubi::FUL3*, Fig. S4B, events #4 and #5) headed two to four days earlier  
150 than the non-transgenic sister lines ( $P < 0.0001$ ). The effect of *Ubi::FUL2* was further  
151 characterized in the F<sub>2</sub> progeny from the cross between *Ubi::FUL2* (*Vrn1Vrn2*) and *vrn1vrn2*-  
152 null under greenhouse conditions. A three-way factorial ANOVA for heading time showed  
153 significant effects for *VRN1*, *Ubi::FUL2* and *VRN2* and for all two- and three-way interactions ( $P$

154 < 0.0001, Table S3). In the presence of a functional *VRN2* allele, the differences in heading time  
155 between *FUL2*-wt and *Ubi::FUL2* alleles were small in lines homozygous for the functional  
156 *VRN1* allele (2.6 d, Fig. S4A), intermediate in *VRN1* heterozygous lines (11.1 d, Fig. S4C) and  
157 large in homozygous *vrn1*-null mutants (53 d, Fig. S4D). These results indicate that the effect of  
158 the *Ubi::FUL2* transgene on heading time depends on the particular *VRN1* and *VRN2* alleles  
159 present in the genetic background (Fig. S4C-D).

160 In summary, the strong effect of *VRN1* in the acceleration of wheat flowering time can mask the  
161 smaller effects of *FUL2* and *FUL3*, but in the absence of *VRN1*, both *FUL2* and *FUL3* have  
162 redundant effects on accelerating wheat flowering time.

### 163 **Flowering delays in *VRN1*, *FUL2* and *FUL3* mutants are associated with reduced *FTI*** 164 **transcript levels in leaves**

165 Since there is a known positive feedback regulatory loop between *VRN1* and *FTI* (Shaw et al.,  
166 2019), we compared the *FTI* transcript levels in the leaves of the different *VRN1*, *FUL2* and  
167 *FUL3* mutant combinations. *FTI* transcript levels higher than *ACTIN* were observed in leaves of  
168 4-week old plants carrying the *VRN1* wild type allele, but were detected only after 10 weeks in  
169 plants carrying the *vrn1*-null allele (Fig. S5A-B). This result is consistent with the large  
170 differences in heading time between these genotypes (Fig. 1D). *FTI* transcript levels in the 10-  
171 week old *vrn1*-null plants was highest in the presence of the *FUL2* and *FUL3* wild type alleles  
172 and lowest in the triple mutant (Fig. S5C), consistent with the higher number of leaves in this  
173 genotype (Fig. 1B). Even in the *vrn1ful2ful3*-null plants, *FTI* transcript levels increased above  
174 *ACTIN* in 14-week old plants (Fig. S5D). Taken together, these results indicate that *FTI*  
175 expression in the leaves are positively regulated by *VRN1*, *FUL2* and *FUL3*, but that they can  
176 also be up-regulated in the absence of these three genes.

### 177 ***VRN1*, *FUL2*, and *FUL3* play critical and redundant roles in spikelet development**

178 Plants with individual *vrn1*-null, *ful2*-null and *ful3*-null mutations produced normal spikelets and  
179 flowers, but *vrn1ful2*-null or *vrn1ful2ful3*-null mutants had spike-like structures in which all  
180 lateral spikelets were replaced by leafy shoots (Fig. 2A-J), henceforth referred to as  
181 “inflorescence tillers”. Removal of these inflorescence tillers revealed a thicker and shorter

182 rachis with fewer internodes of variable length, but still retaining the characteristic alternating  
183 internode angles typical of a wild type rachis (Fig. 2B).

184 In *vrn1ful2*-null, approximately 70% of the central inflorescence tillers had leafy glumes,  
185 lemmas and paleas and abnormal floral organs, whereas the rest were fully vegetative. Floral  
186 abnormalities included leafy lodicules, reduced number of anthers, anthers fused to ovaries, and  
187 multiple ovaries (Fig. 2E-G). After the first modified floret, meristems from these inflorescence  
188 tillers developed two to five true leaves before transitioning again to an IM generating lateral  
189 VMs (Fig. 2E). The combined presence of floral organs and leaves suggests that the originating  
190 meristem had an intermediate identity between VM and SM. In the *vrn1ful2*-null double mutant  
191 the inflorescence tillers were subtended by bracts (Fig. 2C-D).

192 In *vrn1ful2ful3*-null, the lateral meristems generated inflorescence tillers that had no floral  
193 organs, and that were subtended by leaves in the basal positions and bracts in more distal  
194 positions (Fig. 2H-J). The presence of well-developed axillary tillers in these basal inflorescence  
195 leaves (Fig. 2H, L19 and L20) marked the border of the spike-like structure, because no axillary  
196 tillers or developing buds were detected in the true leaves located below this border (Fig. 2H,  
197 L11-L18).

198 Scanning Electron-Microscopy (SEM) images of the early developing inflorescences in the  
199 *vrn1ful2*-null and *vrn1ful2ful3*-null mutants revealed elongated double-ridge structures similar to  
200 those in Kronos (Fig. 3 A) or *vrn1*-null (Fig. 3 C). Suppression of the lower ridge was complete  
201 in Kronos (Fig. 3A) and in *vrn1*-null (Fig. 3D, red arrows), but was incomplete in *vrn1ful2*-null  
202 (Fig. 3B, E; yellow arrows), and even weaker in *vrn1ful2ful3*-null (Fig. 3C, F: green arrows). As  
203 a result of this change, inflorescence tillers were subtended by bracts in *vrn1ful2*-null (Fig. 2C-  
204 D) and by leaves in *vrn1ful2ful3*-null (Fig. 2H-I). The upper ridges (Fig. 3A-C, dots) transitioned  
205 into normal SMs in *vrn1*-null, with glume and lemma primordia (Fig. 3D, G), but looked like  
206 typical vegetative meristems in *vrn1ful2*-null and *vrn1ful2ful3*-null (Fig. 3E-F, H-I).

207 To characterize better the relative effects of *VRN1* and *FUL2*, we examined their individual  
208 effects when present as a single functional copy in a heterozygous state (underlined). Both *ful2*-  
209 null/*Vrn-A1* *vrn-B1*-null (functional *Vrn1* allele for spring growth habit) and *ful2*-null/*vrn-A1*-  
210 null *vrn-B1* (functional *vrn1* allele for winter growth habit) produced spike-like structures with  
211 leafy lateral shoots (Fig. S6A-B) and normal floral organs (Fig. S6C) but no viable seeds. The



212 developing spikes of these plants showed lateral meristems with floral primordia (Fig. S6D),  
213 some of which later showed elongated rachillas and leafy organs (Fig. S6E-G). By contrast, the  
214 presence of a single heterozygous copy of *FUL2* (*vrn1*-null/*ful2-A Ful2-B*) was sufficient to  
215 generate more normal-looking spikelets (Fig. S6H-J), some of which were able to set viable  
216 seeds. Abnormal spikelets (Fig. S6I) and basal branches with lateral spikelets and fertile florets  
217 (Fig. S6J) were also observed in this mutant. Taken together these results indicate that *VRN1*,  
218 *FUL2* and *FUL3* have redundant and essential roles in spikelet development, with *FUL2* having  
219 the strongest effect and *FUL3* the weakest.

### 220 **Transcript levels of *SHORT VEGETATIVE PHASE (SVP)*-like genes *VRT2*, *BM1* and** 221 ***BM10* are upregulated in the developing spikes of the *vrn1ful2*-null mutant**

222 A partial reversion of basal spikelets to vegetative tillers similar to the one described above for  
223 the *vrn1ful2*-null mutant, has been described in barley lines overexpressing *SVP*-like genes *BM1*  
224 or *BM10* (see Discussion). To test if the transcript levels of the *SVP*-like wheat genes were  
225 affected in the *vrn1ful2*-null mutants, we first determined their expression during normal spike  
226 development in Kronos. Transcript levels of the three related paralogs *BM1*, *BM10* and *VRT2*  
227 (RefSeq v1.0 gene designations in Fig. S7) decreased three- to five-fold from the initial stages of  
228 spike development (W2, Waddington scale) to the floret primordium stage (W3.5, Fig. S7A-C).

229 Next, we compared the transcriptional levels of the *SVP*-like wheat genes in *vrn1ful2*-null and  
230 *vrn1*-null mutants. Plants were grown for 53 days in a growth chamber until the developing  
231 spikes of *vrn1*-null reached the terminal spikelet stage and those from *vrn1ful2*-null had a similar  
232 number of lateral meristems. The transcript levels of *BM1*, *BM10* and *VRT2* in the developing  
233 spikes were roughly ten-fold higher in the *vrn1ful2*-null mutant than in the *vrn1*-null and control  
234 lines ( $P < 0.0001$ , Fig. S7D-F). These results suggest that *VRN1* and *FUL2* are either direct or  
235 indirect transcriptional repressors of the three wheat *SVP*-like genes.

### 236 ***FUL2* and *VRN1* have redundant roles on spike determinacy and regulate the number of** 237 **spikelets per spike**

238 Normal wheat spikes are determinate, with the distal IM transitioning into a terminal spikelet  
239 after producing a relatively stable number of lateral meristems (Fig. 4A). In *vrn1ful2*-null, by  
240 contrast, the IM was indeterminate (Fig. 4B) and continued to produce lateral meristems while

241 growing conditions were favorable and eventually died without producing any terminal structure.  
242 In the *ful2*-null background, one functional copy of *VRN1* in the heterozygous state was  
243 sufficient to generate a determinate spike (Fig. S6D, *ful2*-null/*vrn-A1*-null *vrn-B1*), and the same  
244 was true for a single functional copy of *FUL2* in a *vrn1*-null background (Fig. S6K, *vrn1*-  
245 null/*ful2-A* *Ful2-B*).

246 The individual *vrn1*-null and *ful2*-null homozygous mutants showed a larger number of spikelets  
247 per spike than the control. This increase was 58% in the *vrn1*-null mutant ( $P < 0.0001$ , Fig. 4C)  
248 and 10% in the *ful2*-null mutant ( $P = 0.0014$ , Fig. 4D). Although no significant increases in the  
249 number of spikelets per spike were detected in the *ful3*-null mutant ( $P = 0.4096$ , Fig. 4E), two  
250 independent transgenic lines overexpressing *FUL3* (*Ubi::FUL3*) showed an average reduction of  
251 1.12 spikelet per spike relative to their non-transgenic sister lines ( $P = 0.0132$  and  $P < 0.0001$ ,  
252 Fig. S8A), which indicates that *FUL3* can still play a role on the timing of the transition from IM  
253 to terminal spikelet.

254 A similar reduction in the number of spikelets per spike was observed in two independent  
255 *Ubi::FUL2* transgenic lines (1.05 spikelets per spike reduction,  $P < 0.03$ , Fig. S8B). We then  
256 investigated the effect of this transgene in the presence of different *VRN1* and *VRN2* alleles in the  
257 *Ubi::FUL2* x *vrn1vrn2*-null F<sub>2</sub> population. In the *vrn2*-null F<sub>2</sub> plants, the differences in spikelet  
258 number between *Ubi::FUL2* and wild type alleles were larger in *vrn1*-null than in the *Vrn1*-Het  
259 plants (interaction  $P < 0.0001$ , Fig. S8C). In a separate group of F<sub>2</sub> plants fixed for *Vrn1*-Het and  
260 segregating for *VRN2* and *FUL2*, we did not detect significant effects for *Ubi::FUL2* and the  
261 interaction was not significant (Fig. S8D). However, we observed 3.3 more spikelets per spike in  
262 *Vrn2*-wt than in *vrn2*-null plants ( $P < 0.0001$ , Fig. S8D). These results suggest that the strong  
263 *Vrn-A1* allele for spring growth habit can mask the effects of the *Ubi::FUL2* transgene but not  
264 that of *VRN2* on the number of spikelets per spike.

### 265 **Increased transcript levels of *CEN2*, *CEN4* and *CEN5* in developing spikes of the *vrn1ful2*-** 266 **null mutant**

267 Based on the strong effect observed in the Arabidopsis *tfl1* mutant and the *Antirrhinum cen*  
268 mutant on inflorescence determinacy (see Discussion), we investigated the effect of the *vrn1ful2*-  
269 null mutations on the expression levels of the *TFL1/CEN*-like wheat homologs in developing  
270 spikes. Since no previous nomenclature was available for the wheat *CEN* paralogs, we assigned

271 them numbers to match their chromosome locations, and designated them as *CEN2*, *CEN4* and  
272 *CEN5* (RefSeq v1.0 designations can be found in the legend of Fig. S9). The transcript levels of  
273 these three genes were downregulated as the developing spike progressed from the double-ridge  
274 stage to the floret primordium stage (Waddington scale 2 to 3.5, Fig. S9A-C).

275 Comparison of *vrn1ful2*-null and *vrn1*-null plants grown for 53 days in the same growth chamber  
276 showed that the transcript levels of *CEN2*, *CEN4* and *CEN5* were significantly higher ( $P <$   
277  $0.0001$ ) in the developing spikes of the *vrn1ful2*-null mutant than in those of the *vrn1*-null  
278 mutant or the Kronos control (all in *vrn2*-null background). These differences were larger for  
279 *CEN2* and *CEN4* than for *CEN5* (Fig. S9D-F). Taken together, these results suggested that *VRN1*  
280 and *FUL2* work as transcriptional repressors of the *TFL1/CEN*-like wheat homologs.

### 281 **The *ful2*-null mutant produces a higher number of florets per spikelet and more grains per** 282 **spike in the field**

283 In addition to the higher number of spikelets per spike, the *ful2*-null mutant produced a higher  
284 number of florets per spikelet than the Kronos control, an effect that was not observed for *vrn1*-  
285 null (Fig. 2A) or *ful3*-null (Fig. S10A). The average increase in floret number was similar in  
286 *ful2*-null (1.3 florets) and *ful2ful3*-null (0.9 florets), suggesting that *FUL3* has a limited effect on  
287 this trait. In spite of some heterogeneity in the distribution of spikelets with extra florets among  
288 spikes, the differences between the control and the *ful2*-null mutants were significant at all spike  
289 positions (Fig. S10B).

290 Similar increases in the number of florets per spikelet were reported before in Kronos plants  
291 overexpressing *miRNA172* under the *UBIQUITIN* promoter (Debernardi et al., 2017). To study  
292 the genetic interactions between *Ubi::miR172* and *ful2*-null we crossed the transgenic and mutant  
293 lines and studied their effects on floret number in the progeny using a two-way factorial  
294 ANOVA. We detected significant differences in average floret number for both *ful2*-null and  
295 *Ubi::miR172* ( $P < 0.01$ ) and a marginally significant interaction ( $P < 0.0435$ ) that can be  
296 visualized in the interaction graph in Fig. S10C. The differences in average floret number  
297 between *ful2*-null and the wild type control were larger (and more variable) in the *Ubi::miR172*  
298 than in the non-transgenic background (Fig. S10C). This synergistic interaction suggests that  
299 *miRNA172* and *FUL2* may control floret number through a common pathway. Both the mutant

300 and transgenic lines showed heterogeneity among spikes in the location of spikelets with  
301 increased numbers of florets (Fig. S10D-F).

302 Based on its positive effect on the number of florets per spikelet and spikelets per spike (and its  
303 small effect on heading time), we selected the *ful2*-null mutant for evaluation in a replicated field  
304 experiment. Relative to the control, the *ful2*-null mutant produced 20% more spikelets per spike  
305 ( $P = 0.0002$ ) and 9% more grains per spikelet ( $P = 0.05$ ), which resulted in a 31% increase in the  
306 number of grains per spike ( $P = 0.0002$ , Fig. 4F). Although part of the positive effect on grain  
307 yield was offset by a 19% reduction in average kernel weight ( $P = 0.0012$ ), we observed a slight  
308 net increase of 6% in total grain weight per spike ( $P = 0.09$ , Fig. 4F). This negative correlation  
309 between grain number and grain weight suggests that in this particular genotype by environment  
310 combination grain yield was more limited by the “source” (produced and transported starch) than  
311 by the “sink” (number and size of grains).

312

## 313 **DISCUSSION**

314 Results from this study have shown that wheat *VRN1*, *FUL2* and *FUL3* have overlapping  
315 functions in stem elongation, flowering time, and spike development, which are discussed  
316 separately in the following sections.

### 317 **Mutations in *VRN1*, *FUL2* and *FUL3* reduce stem elongation**

318 We detected highly significant effects of *VRN1*, *FUL2* and *FUL3* on plant height and significant  
319 synergistic interactions (Fig. 1A, C). These results suggest that *VRN1*, *FUL2* and *FUL3* have  
320 redundant functions in the regulation of stem elongation, and that their individual effects are  
321 magnified in the absence of the other paralogs. Significant reductions in plant height were also  
322 reported for rice mutants *Osmads14* (12.2% reduction) and *Osmads15* (9.0 % reduction), and the  
323 double mutant (43.8% reduction), suggesting a conserved function in grasses (Wu et al., 2017).

324 Although the molecular mechanisms by which these genes affect stem elongation are currently  
325 unknown, an indirect way by which they may contribute to this trait is through their strong effect  
326 on the regulation of *FT1* (Fig. S5), which is associated with the upregulation of GA biosynthetic  
327 genes in the developing spike (Pearce et al., 2013). A recent study has shown that rice *HEADING*  
328 *DATE 3* (*Hd3*) and *RICE FLOWERING LOCUS T 1* (*RFT1*), the orthologs of wheat *FT1*, can

329 increase stem responsiveness to GA by reducing *PREMATURE INTERNODE ELONGATION 1*  
330 (*PINE1*) expression in the SAM and compressed stem (Gómez-Ariza et al., 2019). In  
331 Arabidopsis, a number of genes involved in hormone pathways are direct targets of FUL, which  
332 may explain the shorter stem and internodes detected in the *ful* mutant (Bemer et al., 2017). A  
333 characterization of the direct DNA targets and protein interactors of VRN1, FUL2 and FUL3  
334 may shed light on the mechanisms responsible for the conserved role of these genes in plant  
335 height in grasses.

336

### 337 **Mutations in *VRN1*, *FUL2* and *FUL3* delay flowering initiation in wheat**

338 *VRN1* is one of the main genes controlling natural variation in wheat flowering time (Fu et al.,  
339 2005; Kippes et al., 2016; Yan et al., 2003; Zhang et al., 2008), so it was not surprising that *vrn1*-  
340 null delayed heading time more than *ful2*-null or *ful3*-null. Although the strong *Vrn-A1* allele for  
341 spring growth habit masked the smaller effects of *FUL2* and *FUL3* (Fig. 1A-C), in the *vrn1*-null  
342 background, the *ful2*-null and *ful3*-null mutants showed delayed flowering initiation and  
343 increased number of leaves (Fig. 1B, F), indicating that *FUL2* and *FUL3* have retained some  
344 residual functionality in the acceleration of wheat flowering time. This was further confirmed by  
345 the accelerated flowering of the *Ubi::FUL2* and *Ubi::FUL3* transgenic plants (Fig. S4A-B).  
346 Similar results have been reported in *Brachypodium distachyon* and rice. In *Brachypodium*,  
347 overexpression of *VRN1* (Ream et al., 2014), *FUL2* or *FUL3* (Li et al., 2016) accelerates  
348 flowering, and downregulation of *VRN1* delays flowering relative to non-transgenic controls  
349 (Woods et al., 2016). In rice, overexpression of *OsMADS15* also accelerates flowering (Lu et al.,  
350 2012). These results suggest a conserved role of these genes in the regulation of flowering time  
351 in grasses.

352 Previous studies have shown a significant genetic interaction between wheat *VRN1* and *VRN2* in  
353 the regulation of heading time (Tranquilli and Dubcovsky, 2000). This study shows that similar  
354 interactions exist between *FUL2* and *VRN2* (Fig. S4C-D). A tetraploid wheat population  
355 segregating for *VRN1*, *FUL2* and *VRN2* revealed highly significant two-way and three-way  
356 interactions among these genes, indicating that the effect of each of these genes on heading time  
357 is dependent on the particular combination of alleles present for the other two. Previous studies  
358 have shown that part of the ability of *VRN1* to accelerate flowering depends on its ability to

359 repress *VRN2* (Chen and Dubcovsky, 2012). The larger effect on heading time of the *Ubi::FUL2*  
360 transgene in the presence of the functional *Vrn2* than in the *vrn2*-null background (Fig. S4C-D)  
361 suggests that *FUL2* repression of *VRN2* can also contribute to its ability to accelerate heading  
362 time.

363 Interestingly, mutations in *VRN1*, *FUL2* and *FUL3* were associated with delayed induction of  
364 *FTI* even in the absence of functional *VRN2* alleles (Fig. S5). Lines carrying the wild type *VRN1*  
365 allele showed high levels of *FTI* in the leaves six weeks earlier than lines carrying the *vrn1*-null  
366 allele and flowered 37 days earlier. Among the lines carrying the *vrn1*-null allele, those with  
367 mutation in both *FUL2* and *FUL3*, showed the latest induction of *FTI* (Fig. S5C-D) and had 3.3  
368 more leaves (excluding leaves in the spike-like structure, Fig. 1B). However, in 14-week-old  
369 *vrn1ful2ful3*-null plants *FTI* transcripts still reached higher levels than *ACTIN*. These results  
370 indicate that *VRN1*, *FUL2* and *FUL3* are positive transcriptional regulators of *FTI* but they are  
371 not essential for its expression in the leaves.

372 *FTI* has also been shown to be a positive regulator of *VRN1* expression in both leaves and SAM.  
373 Natural variation or transformation experiments that affect *FTI* transcript levels in the leaves are  
374 always associated with parallel changes in *VRN1* expression (Lv et al., 2014; Yan et al., 2006).  
375 Taken together, these results suggest the existence of a positive regulatory feedback loop in  
376 which each gene acts as a positive regulator of the other. Although this feedback loop can be  
377 mediated in some cases by *VRN2* (Distelfeld et al., 2009a), results from this study and from  
378 Shaw et al. (2019) in a *vrn2*-null background suggest the existence of a positive feedback loop  
379 that operates independently of *VRN2*. Studies in rice have suggested the possibility of a similar  
380 regulatory feedback loop between the orthologous genes (Kobayashi et al., 2012).

### 381 ***VRN1*, *FUL2* and *FUL3* play critical and redundant roles in spikelet development**

382 RNA *in situ* hybridization studies at the early stages of inflorescence development in *Lolium*  
383 *temulentum* (Gocal et al., 2001), wheat and oat (Preston and Kellogg, 2008), and early-diverging  
384 grasses (Preston et al., 2009) have shown *VRN1* and *FUL2* expression in the IM, lateral SMs and  
385 FMs. Similarly, transgenic barley plants transformed with a *VRN-H1* promoter fused with GFP  
386 showed fluorescence in the three meristems (Alonso-Peral et al., 2011). *VRN1*, *FUL2*, and *FUL3*  
387 can interact with different MADS-box partners in the IM, SMs, and FMs and, therefore,  
388 mutations in these genes can alter different functions in different meristems.

389 The significant effects of *VRN1*, *FUL2*, and *FUL3* on the timing of the transitions from the  
390 vegetative SAM to IM and from IM to terminal spikelet indicate that these genes play important  
391 roles in the acquisition and termination of IM identity. During the early stages of spike  
392 development both *vrn1ful2*-null and *vrn1ful2ful3*-null mutants showed an elongated double-ridge  
393 structure with lateral meristems organized in a distichous phyllotaxis that were similar to the  
394 Kronos control (Fig. 3A-C), and both mutants had a rachis similar to a normal spike rachis (Fig.  
395 2B). These results suggest that these IM functions were not disrupted by the combined mutation  
396 in *VRN1*, *FUL2*, and *FUL3*.

397 After the double-ridge stage, the development of the lateral meristems diverged drastically in  
398 *vrn1ful2*-null and *vrn1ful2ful3*-null mutants relative to the *vrn1*-null control. In *vrn1*-null, the  
399 upper ridges transitioned into SMs that generated normal spikelets, whereas in *vrn1ful2ful3*-null  
400 they transitioned into lateral VMs that generated inflorescence tillers (which we interpret as the  
401 default identity of an axillary meristem). The *vrn1ful2*-null mutant generated an intermediate  
402 structure that produced both leafy-floral organs and leaves. Based on these results we concluded  
403 that *VRN1*, *FUL2* and *FUL3* play essential and redundant roles in spikelet and floral  
404 development. However, we currently do not know if the transition of the upper ridges to SMs  
405 requires the expression of functional VRN1, FUL2 and FUL3 proteins in the upper ridge, in the  
406 IM, or in both.

407 Replacement of basal spikelets with inflorescence tillers similar to the ones described for  
408 *vrn1ful2ful3*-null was observed in barley plants overexpressing *BMI* and *BM10* (Trevaskis et al.,  
409 2007). These two genes, together with *VRT2*, are related to the Arabidopsis MADS-box genes  
410 *SVP* and *AGAMOUS-LIKE 24 (AGL24)*, which play important roles in the formation of floral  
411 meristems (Kaufmann et al., 2010; Liu et al., 2007). In Arabidopsis, *SVP* and *AGL24* are directly  
412 repressed by AP1 (Kaufmann et al., 2010). In the absence of AP1, ectopic expression of *SVP* and  
413 *AGL24* transformed floral meristems into shoot meristems (Liu et al., 2007). The up-regulation  
414 of *VRT2*, *BMI* and *BM10* in the *vrn1ful2*-null developing wheat spikes (Fig. S7), together with  
415 the transgenic barley results, suggest that these genes may have contributed to the observed  
416 replacement of spikelets by vegetative tillers in *vrn1ful2*-null.

417 **Both *vrn1ful2*-null and *vrn1ful2ful3*-null mutants showed reduced suppression of the lower**  
418 **ridge**

419 An important characteristic of a grass IM is the complete suppression of the lower ridge  
420 subtending all branching events, which in the wheat spike is the suppression of the lower ridge  
421 subtending the spikelet. This suppression was disrupted in the *vrn1ful2*-null and *vrn1ful2ful3*-  
422 null mutants, which developed bracts or leaves subtending the inflorescence tillers (Fig. 2C-D  
423 and H-J). These results suggest that all three genes contribute to the suppression of the lower  
424 ridge, but we do not know if this suppression requires the expression of the VRN1, FUL2 and  
425 FUL3 in the lateral meristem, in the IM, or in both. In this case, an indirect IM effect seems more  
426 likely because *in situ* hybridization studies have detected *VRN1* and *FUL2* (or their grass  
427 orthologs) in the upper ridge rather than in the lower ridge (Gocal et al., 2001; Preston and  
428 Kellogg, 2008) (Preston et al., 2009). However a more direct effect on the lateral meristem  
429 cannot be ruled out because a VRN1:GFP fusion driven by the *VRN1* promoter was detected in  
430 the lower ridge of the developing spike in barley (Alonso-Peral et al., 2011).

431 The inflorescence tillers subtended by leaves in *vrn1ful2ful3*-null were not very different from  
432 vegetative tillers, but there was a difference that marked a clear boundary between them. In rice  
433 and wheat, true leaves do not show axillary buds or tillers until 4-5 younger leaves are formed  
434 (Friend, 1965; Oikawa and Kyojuka, 2009). Then, bud development into tillers proceeds  
435 sequentially from older to younger leaves. By contrast, leaves developed from the lower ridge in  
436 *vrn1ful2ful3*-null (Fig. 3C, F) had axillary meristems (the upper ridge) from the beginning, which  
437 rapidly developed into axillary tillers (Fig. 2H, L19 and L20). True leaves below the  
438 inflorescence (Fig. 2H, L11-L18) showed no visible axillary buds, which is normal for wheat  
439 leaves that subtend an elongated internode (Williams and Langer, 1975). In summary, even in  
440 the *vrn1ful2ful3*-null mutant a clear boundary was established between the inflorescence and the  
441 vegetative leaves.

#### 442 **Interpretation of observed meristem identity changes**

443 An inflorescence phenotype similar to the one described here for the *vrn1ful2ful3*-null wheat  
444 mutant has been described for the rice *Osmads14Osmads15Osmads18Ospap2* quadruple knock-  
445 down, in which the panicle was replaced by tillers subtended by leaves (Kobayashi et al., 2012).  
446 The authors of the rice study interpreted this phenotype as the result of an incomplete transition  
447 between the vegetative SAM and the IM, and suggested that these genes act redundantly to  
448 promote IM identity and, therefore, are IM identity genes.



449 In wheat *vrn1ful2ful3*-null, the changes observed in the lateral meristems can be also explained  
450 by postulating an indirect effect of the IM on the regulation of genes expressed in the signaling  
451 centers flanking the lateral meristems. However, the same changes can be explained by a more  
452 direct effect of non-functional VRN1, FUL2 and FUL3 proteins in the lateral meristem, where  
453 they are normally expressed. If this second interpretation is correct, *VRN1*, *FUL2* and *FUL3*  
454 should be considered to include SM identity functions, in addition to IM and FM identity  
455 functions. This proposed SM identity function is consistent with the role of homologous FM  
456 identity genes *API*, *CAL* and *FUL* in Arabidopsis (Ferrándiz et al., 2000). Regardless of their  
457 direct or indirect effect on SM identity, *VRN1*, *FUL2* and *FUL3* are essential for spikelet  
458 development in both wheat and rice.

459 This does not seem to be the case for *PAP2* or its wheat ortholog *AGLG1* (Yan et al., 2003).  
460 Kobayashi et al. (2012) suggested that the loss of function of this gene was important for the rice  
461 *Osmads14Osmads15Osmads18Ospap2* phenotype. However, the complete suppression of  
462 spikelets in the presence of functional *PAP2/AGLG1* genes in rice *Osmads14Osmads15* (Wu et  
463 al., 2017) and wheat *vrn1ful2ful3*-null mutants suggests a less critical role of *PAP2* on SM  
464 identity.

465

#### 466 ***VRN1* and *FUL2* have essential and redundant roles in wheat spike determinacy**

467 The determinate growth of the wheat spike is marked by the transition of the distal IM into a SM  
468 and the formation of a terminal spikelet. However, the *vrn1ful2*-null mutant was unable to form  
469 spikelets and the IM remained indeterminate. A single functional copy of *VRN1* or *FUL2* in a  
470 heterozygous state was sufficient to restore spike determinacy (Fig S5D, K), suggesting that the  
471 wheat IM is very sensitive to the activity of these genes.

472 Loss-of-function mutations in *TERMINAL FLOWER 1 (TFL1)* in Arabidopsis or in the  
473 *CENTRORADIALIS (CEN)* homolog in *Antirrhinum* result in the formation of a terminal flower  
474 and the transformation of indeterminate into determinate inflorescences (Bradley et al., 1997;  
475 Ratcliffe et al., 1999). In rice, knockdowns of the four *CEN* homologs (*RCN1-RCN4*) reduced  
476 the number of branches, whereas their overexpression increased branch number by competing  
477 with rice *FT* homologs (Kaneko-Suzuki et al., 2018; Nakagawa et al., 2002). In wheat  
478 overexpression of *CEN-D2* extended the duration of the double-ridge stage and increased the

479 number of spikelets per spike in wheat (Wang et al., 2017), whereas loss-of-function mutations  
480 in barley *CEN2* reduced the number of spikelets per spike (Bi et al., 2019). Based on these  
481 results, we hypothesize that the upregulation of the wheat *CEN2*, *CEN4* and *CEN5* homologs in  
482 the developing spike of the *vrn1ful2*-null mutant might have contributed to its indeterminate  
483 growth.

#### 484 **The *vrn1*-null and *ful2*-null mutants have a higher number of spikelets per spike**

485 We showed in this study that the timing of the transition between the IM and the terminal  
486 spikelet is modulated by *VRN1* and *FUL2* and that this affects the number of spikelets per spike.  
487 The stronger effect of *vrn1*-null (nine additional spikelets, Fig. 4C) relative to *ful2*-null (two  
488 additional spikelets, Fig. 4D) is likely associated with *VRN1*'s stronger effect on heading time  
489 (Fig. 1A-C), which provides more time for the formation of additional spikelets. This seems to  
490 be also the case in rice, where overexpression of *OsMADS15*, resulted in reduced number of  
491 primary branches in the panicle (Lu et al., 2012). Similarly, a stop codon mutation in a homolog  
492 of AP1 in rapeseed altered plant architecture and increased the number of seeds per plant (Shah  
493 et al., 2018). Taken together, these results suggest that mutations in this group of meristem  
494 identity genes may be useful to modulate seed number in different plant species.

495 In addition to its effect on spikelet number, the *ful2*-null mutation was also associated with an  
496 increase in the number of florets per spikelet, which suggests that this gene contributes to  
497 maintaining a limited number of florets per spikelet (Fig. S10C-F). This effect was not detected  
498 in *vrn1*-null and *ful3*-null. Since a higher number of florets per spikelet and increased spikelet  
499 number can both contribute to increases in grain yield potential, we explored the effect of the  
500 *ful2*-null mutant on grain yield components. In a field study, the *ful2*-null plants showed a 30.8%  
501 increase in the average number of grains per spike compared with the control sister lines.  
502 Although in this experiment the positive increase in grain number was partially offset by a  
503 decrease in average grain weight, the total grain weight per spike was still slightly higher (6.3%)  
504 in the *ful2*-null mutant relative to the control. It would be interesting to test if the introgression of  
505 this mutation in genotypes which high biomass (increased "source") grown under optimum  
506 agronomic conditions can reduce the negative correlation between grain number and grain  
507 weight.

508 In summary, our results indicate that *VRNI*, *FUL2* and *FUL3* play redundant and essential roles  
509 in spikelet development, repression of the lower ridge and spike determinacy, and that mutations  
510 in *VRNI* and *FUL2* can be used to increase the number of spikelets per spike, an important  
511 component of grain yield. These results suggest that a better understanding of the processes that  
512 control the development of grass flowers and inflorescences may contribute to improving the  
513 productivity of a group of species that is critical for the global food supply.

514

## 515 **ACKNOWLEDGEMENTS**

516 This project was supported by the Howard Hughes Medical Institute, NRI Competitive Grant  
517 2016-67013-24617 from the USDA National Institute of Food and Agriculture (NIFA) and the  
518 International Wheat Partnership Initiative (IWYP). We thank Dr. Alejandra Alvarez and Dr. Josh  
519 Hegarty for their help with field experiments and Dr. Daniel Wood and Dr. Juan Debernardi for  
520 their valuable comments and suggestions. We thank the anonymous reviewers for their helpful  
521 comments and valuable suggestions.

522

523

## 524 **COMPETING FINANCIAL INTERESTS STATEMENT**

525 The authors declare no conflict of interest.

526

## 527 **AUTHOR CONTRIBUTIONS**

528 CL and JD designed research; JD provided overall supervision to the project; HL, CL, AC, ML  
529 and JJ performed research; CL, HL and JD analyzed data; JD provided statistical analyses; CL  
530 wrote first draft and JD the final version. All authors reviewed the paper.

531

## 532 **MATERIALS AND METHODS**

### 533 **Selected mutations and mutant combinations**

534 An ethyl methane sulphonate (EMS) mutagenized population of the tetraploid wheat variety  
535 Kronos was screened for mutations initially using *CeII* assays (Uauy et al., 2009) and later using  
536 BLAST searches in the database of sequenced mutations for the same population (Krasileva et

537 al., 2017). We identified loss-of-function mutations in the A and B genome homeologs of *FUL2*  
538 and *FUL3*, which were confirmed using genome specific primers described in Table S1. Single  
539 genome mutants were backcrossed two to three times to Kronos *vrn2*-null to reduce background  
540 mutations. The wild type Kronos carries a functional *VERNALIZATION 2* (*VRN2*) flowering  
541 repressor, which results in extremely late flowering in the presence of the *vrn1*-null mutation  
542 (Chen and Dubcovsky, 2012). To avoid this problem all mutants described in this study were  
543 developed in a Kronos *vrn2*-null background (Distelfeld et al., 2009b), unless indicated  
544 otherwise.

545 For *FUL-A2*, we selected line T4-837 (henceforth *ful-A2*), which has a mutation in the splice  
546 donor site of the fifth intron. RT-PCR and sequencing analysis of the *ful-A2* transcripts revealed  
547 two incorrect splicing forms. The most abundant form skipped the fifth exon, which resulted in a  
548 deletion of 14 amino acids in the middle of the K-box ( $\Delta 144-157$ ). In the other alternative  
549 splicing form, the retention and translation of the fifth intron generated a premature stop codon  
550 that disrupted the K-box and removed the entire C-terminus (Fig. S2A). For *FUL-B2*, we  
551 selected line T4-2911 that carries a C to T change at nucleotide 484 (henceforth *ful-B2*). The *ful-*  
552 *B2* mutation generates a premature stop codon at position 162 (Q162\*) that removed the last 13  
553 amino acids of the K-box and the entire C-terminus (Fig. S2A).

554 For *FUL-A3*, we selected line T4-2375 that carries a G to A mutation in the splice acceptor site  
555 of the third intron. Sequencing of *ful-A3* transcripts revealed that this mutation generated a new  
556 splice acceptor site that shifted the reading frame by one nucleotide. The alternative translation  
557 generated a premature stop codon that truncated 72% of the K-box and the entire C-terminus  
558 (Fig. S2B). For *FUL-B3*, we selected line T4-2139 that carries a C to T mutation at nucleotide  
559 position 394 that generates a premature stop codon at amino acid position 132 (Q132\*). This  
560 premature stop removed half of the K-box and the complete C-terminus (Fig. S2B). Given the  
561 critical roles of the K-domain in protein-protein interactions, and the C-terminal domain in  
562 transcriptional activation, these selected mutations are expected to impair the normal function of  
563 the *FUL2* and *FUL3* proteins.

564 The A and B-genome mutants for each gene were intercrossed to generate double mutants, which  
565 for simplicity, are referred to hereafter as null mutants. The *ful2*-null and *ful3*-null were  
566 intercrossed with a *vrn1vrn2*-null mutant (*vrn-A1*-null T4-2268 / *vrn-B1* T4-2619 / *vrn2*-null)

567 (Chen and Dubcovsky, 2012) to generate *vrn1ful2*-null and *vrn1ful3*-null, which were finally  
568 intercrossed to generate *vrn1ful2ful3*-null (all in a *vrn2*-null background). The *vrn1ful2*-null and  
569 *vrn1ful2ful3*-null mutants were sterile, so they were maintained and crossed by keeping the *ful*-  
570 *B2* mutation in heterozygous state. The single mutants are available as part of the public  
571 sequenced TILLING populations (Krasileva et al., 2017) and the mutant combinations are  
572 available upon request.

573 Transgenic Kronos plants overexpressing *FUL2* and *FUL3* coding regions were generated at the  
574 UC Davis Transformation facility using *Agrobacterium*-mediated transformation. The coding  
575 regions of these two genes were cloned from Kronos into the binary vector pLC41 (Japan  
576 Tobacco, Tokyo, Japan) downstream of the maize *UBIQUITIN* promoter. A C-terminal 3xHA  
577 tag was added to *FUL2* and a C-terminal 4xMYC tag was added to *FUL3*. Mutant and transgenic  
578 wheat plants were grown in PGR15 CONVIRON chambers under LD (16h light/8h dark, light  
579 intensity  $\sim 330 \mu\text{M m}^{-2} \text{s}^{-1}$ ) at 22 °C during the day and 18 °C during the night.

580 To study the effect of *Ubi::FUL2* in different genetic backgrounds we crossed the Kronos  
581 *Ubi::FUL2* with Kronos-*vrn1vrn2*-null and analyzed the effect of the three genes in the F<sub>2</sub>  
582 progeny under greenhouse conditions. A field experiment comparing *ful2*-null and its control  
583 line was performed at the University of California, Davis field station during the 2017-2018  
584 growing season (sowed on 12/1/2017 and harvested on 06/25/2018). One meter rows (30 grains  
585 per row) were used as experimental units and the experiment was organized in a randomized  
586 complete block design with eight blocks. During the growing season plants received 200 units of  
587 N as ammonium sulfate, three irrigations, one application of broad-leaf herbicides (2, 4D +  
588 Buctril) and alternating applications of fungicides Quadris and Tilt every 2 weeks.

### 589 **Effect of the splice site mutations in *ful-A2* and *ful-B3* mutants**

590 To determine the effect of the splice site mutations in *ful-A2* and *ful-B3*, we extracted total RNA  
591 from leaf samples using the Spectrum™ Plant Total RNA kit. cDNA was synthesized from 2  $\mu\text{g}$   
592 of RNA using the High Capacity Reverse Transcription Kit according to the manufacturer's  
593 instructions and used as RT-PCR template. For *ful-A2*, we used primers *FUL2-837-F* (5'-  
594 CCATACAAAATGTCACAAGC-3') and *FUL2-837-R* (5'-TTCTGC CTCTCCACCAGTT-3')  
595 for RT-PCR. These primers, which are not genome specific, amplified three fragments of 303 bp,

596 220 bp and 178 bp. We gel-purified these fragments, cloned them into pGEM-T vector  
597 (Promega), and sequenced them. The 220 bp fragment was from the wild type *FUL-B2* allele,  
598 whereas the other two fragments corresponded to two alternative splicing forms of *ful-A2* that  
599 either retained the fifth intron (303 bp) or skipped the fifth exon (178 bp).

600 For the *ful-B3* mutant, we performed RT-PCR using primers FUL3-2375-F (5'-  
601 ATGGATGTGATTCTTGAAC-3') and FUL3-2375-R (5'-  
602 TGTCCTGCAGAAGCACCTCGTAGAGA-3'). Sequencing analysis of the PCR products  
603 showed that the G to A mutation generated a new splice acceptor site with an adjacent G that  
604 shifted the reading frame by one nucleotide after 333 bp, and generated a premature stop codon.

### 605 **Scanning Electron-Microscopy (SEM)**

606 Apices from different developmental stages were dissected and fixed for a minimum of 24 h in  
607 FAA (50% ethanol, 5% (v/v) acetic acid, 3.7% (v/v) formaldehyde), and then dehydrated  
608 through a graded ethanol series to absolute ethanol. Samples were critical-point dried in liquid  
609 CO<sub>2</sub> (tousimis ® 931 Series critical point drier), mounted on aluminum stubs, sputter-coated  
610 with gold (Bio-Rad SEM Coating System Model E5100), and examined with a Philips XL30  
611 scanning electron-microscope operating at 5KV. Images were recorded at slow scan 3 for high  
612 definition and saved as TIFF files.

### 613 **RNA extraction and Real-time qPCR analysis**

614 RNAs from apices were extracted using the Trizol reagent (ThermoFisher Scientific, Cat.  
615 No.15596026). One µg of RNA was used for cDNA synthesis following the instructions of the  
616 “High-Capacity cDNA Reverse Transcription Kit” (ThermoFisher Scientific, Cat. No. 4368814).  
617 The cDNA was then diluted 20 times and 5 µl of the dilution was mixed with 2×VeriQuest Fast  
618 SYBR Green qPCR Master Mix (Affymetrix, Cat. No. 75690) and with primers for the real-time  
619 qPCR analysis. Primer sequences are listed in Table S2. *INNITIATION FACTOR 4A (IF4A)* and  
620 *ACTIN* were used as an endogenous controls. Transcript levels for all genes are expressed as  
621 linearized fold- *IF4A* levels calculated by the formula  $2^{(IF4A C_T - TARGET C_T)} \pm$  standard error (SE) of  
622 the mean. The resulting number indicates the ratio between the initial number of molecules of the  
623 target gene and the number of molecules in the endogenous control.

624

625 **REFERENCES**

- 626 **Alonso-Peral, M. M., Oliver, S. N., Casao, M. C., Greenup, A. A. and Trevaskis, B.**  
627 (2011). The promoter of the cereal *VERNALIZATION1* gene is sufficient for transcriptional  
628 induction by prolonged cold. *PLoS One* **6**, e29456.
- 629 **Bemer, M., van Mourik, H., Muino, J. M., Ferrandiz, C., Kaufmann, K. and**  
630 **Angenent, G. C.** (2017). FRUITFULL controls *SAUR10* expression and regulates Arabidopsis  
631 growth and architecture. *Journal of Experimental Botany* **68**, 3391-3403.
- 632 **Bi, X., van Esse, G. W., Mulki, M. A., Kirschner, G., Zhong, J., Simon, R. and von**  
633 **Korff, M.** (2019). *CENTRORADIALIS* interacts with *FLOWERING LOCUS T*-like genes to  
634 control floret development and grain number. *Plant Physiology* On line first.,  
635 DOI:10.1104/pp.18.01454.
- 636 **Bradley, D., Ratcliffe, O., Vincent, C., Carpenter, R. and Coen, E.** (1997).  
637 Inflorescence commitment and architecture in Arabidopsis. *Science* **275**, 80-83.
- 638 **Chen, A. and Dubcovsky, J.** (2012). Wheat TILLING mutants show that the  
639 vernalization gene *VRN1* down-regulates the flowering repressor *VRN2* in leaves but is not  
640 essential for flowering. *PLoS Genetics* **8**, e1003134.
- 641 **Ciaffi, M., Paolacci, A. R., Tanzarella, O. A. and Porceddu, E.** (2011). Molecular  
642 aspects of flower development in grasses. *Sexual Plant Reproduction* **24**, 247-282.
- 643 **Debernardi, J. M., Lin, H., Chuck, G., Faris, J. D. and Dubcovsky, J.** (2017).  
644 microRNA172 plays a crucial role in wheat spike morphogenesis and grain threshability.  
645 *Development* **144**, 1966-1975.
- 646 **Distelfeld, A., Li, C. and Dubcovsky, J.** (2009a). Regulation of flowering in temperate  
647 cereals. *Current Opinion in Plant Biology* **12**, 178-184.
- 648 **Distelfeld, A., Tranquilli, G., Li, C., Yan, L. and Dubcovsky, J.** (2009b). Genetic and  
649 molecular characterization of the *VRN2* loci in tetraploid wheat. *Plant Physiology* **149**, 245-257.
- 650 **Ferrándiz, C., Gu, Q., Martienssen, R. and Yanofsky, M. F.** (2000). Redundant  
651 regulation of meristem identity and plant architecture by *FRUITFULL*, *APETALA1* and  
652 *CAULIFLOWER*. *Development* **127**, 725-734.

- 653           **Friend, D. J. C.** (1965). Tillering and leaf production in wheat as affected by  
654 temperature and light intensity. *Canadian Journal of Botany* **43**, 1063-&.
- 655           **Fu, D., Szűcs, P., Yan, L., Helguera, M., Skinner, J., Hayes, P. and Dubcovsky, J.**  
656 (2005). Large deletions within the first intron in *VRN-1* are associated with spring growth habit  
657 in barley and wheat. *Molecular Genetics and Genomics* **273**, 54-65.
- 658           **Gocal, G. F. W., King, R. W., Blundell, C. A., Schwartz, O. M., Andersen, C. H. and**  
659 **Weigel, D.** (2001). Evolution of floral meristem identity genes. Analysis of *Lolium temulentum*  
660 genes related to *APETALA1* and *LEAFY* of Arabidopsis. *Plant Physiology* **125**, 1788-1801.
- 661           **Gómez-Ariza, J., Brambilla, V., Vicentini, G., Landini, M., Cerise, M., Carrera, E.,**  
662 **Shrestha, R., Chiozzotto, R., Galbiati, F., Caporali, E. et al.** (2019). A transcription factor  
663 coordinating internode elongation and photoperiodic signals in rice. *Nature Plants* **5**, 358-362.
- 664           **Honma, T. and Goto, K.** (2001). Complexes of MADS-box proteins are sufficient to  
665 convert leaves into floral organs. *Nature* **409**, 525-9.
- 666           **Kaneko-Suzuki, M., Kurihara-Ishikawa, R., Okushita-Terakawa, C., Kojima, C.,**  
667 **Nagano-Fujiwara, M., Ohki, I., Tsuji, H., Shimamoto, K. and Taoka, K. I.** (2018). TFL1-  
668 like proteins in rice antagonize rice FT-like protein in inflorescence development by competition  
669 for complex formation with 14-3-3 and FD. *Plant and Cell Physiology* **59**, 458-468.
- 670           **Kaufmann, K., Wellmer, F., Muino, J. M., Ferrier, T., Wuest, S. E., Kumar, V.,**  
671 **Serrano-Mislata, A., Madueno, F., Krajewski, P., Meyerowitz, E. M. et al.** (2010).  
672 Orchestration of floral initiation by APETALA1. *Science* **328**, 85-89.
- 673           **Kellogg, E. A.** (2001). Evolutionary history of the grasses. *Plant Physiology* **125**, 198-  
674 1205.
- 675           **Kellogg, E. A., Camara, P. E. A. S., Rudall, P. J., Ladd, P., Malcomber, S. T.,**  
676 **Whipple, C. J. and Doust, A. N.** (2013). Early inflorescence development in the grasses  
677 (Poaceae). *Frontiers in Plant Science* **4**, 250.
- 678           **Kippes, N., Chen, A., Zhang, X., Lukaszewski, A. J. and Dubcovsky, J.** (2016).  
679 Development and characterization of a spring hexaploid wheat line with no functional *VRN2*  
680 genes. *Theoretical and Applied Genetics* **129**, 1417–1428.



681 **Kobayashi, K., Yasuno, N., Sato, Y., Yoda, M., Yamazaki, R., Kimizu, M., Yoshida,**  
682 **H., Nagamura, Y. and Kyojuka, J.** (2012). Inflorescence meristem identity in rice is specified  
683 by overlapping functions of three *API/FUL*-like MADS box genes and *PAP2*, a *SEPALLATA*  
684 MADS box gene. *Plant Cell* **24**, 1848-1859.

685 **Krasileva, K. V., Vasquez-Gross, H., Howell, T., Bailey, P., Paraiso, F., Clissold, L.,**  
686 **Simmonds, J., Ramirez-Gonzalez, R. H., Wang, X., Borrill, P. et al.** (2017). Uncovering  
687 hidden variation in polyploid wheat. *Proceedings of the National Academy of Sciences of the*  
688 *United States of America* **114**, E913–E921

689 **Li, Q., Wang, Y., Wang, F. X., Guo, Y. Y., Duan, X. Q., Sun, J. H. and An, H. L.**  
690 (2016). Functional conservation and diversification of *APETALA1/FRUITFULL* genes in  
691 *Brachypodium distachyon*. *Physiologia Plantarum* **157**, 507-518.

692 **Liu, C., Zhou, J., Bracha-Drori, K., Yalovsky, S., Ito, T. and Yu, H.** (2007).  
693 Specification of Arabidopsis floral meristem identity by repression of flowering time genes.  
694 *Development* **134**, 1901-1910.

695 **Lu, S. J., Wei, H., Wang, Y., Wang, H. M., Yang, R. F., Zhang, X. B. and Tu, J. M.**  
696 (2012). Overexpression of a transcription factor *OsMADS15* modifies plant architecture and  
697 flowering time in rice (*Oryza sativa* L.). *Plant Molecular Biology Reporter* **30**, 1461-1469.

698 **Lv, B., Nitcher, R., Han, X., Wang, S., Ni, F., Li, K., Pearce, S., Wu, J., Dubcovsky,**  
699 **J. and Fu, D.** (2014). Characterization of *FLOWERING LOCUS T1 (FT1)* gene in  
700 *Brachypodium* and wheat. *PLoS One* **9**, e94171.

701 **Malcomber, S. T., Preston, J. C., Reinheimer, R., Kossuth, J. and Kellogg, E. A.**  
702 (2006). Developmental gene evolution and the origin of grass inflorescence diversity. *Advances*  
703 *in Botanical Research* **44**, 425-481.

704 **McSteen, P., Laudencia-Chingcuanco, D. and Colasanti, J.** (2000). A floret by any  
705 other name: control of meristem identity in maize. *Trends in Plant Science* **5**, 61-66.

706 **Nakagawa, M., Shimamoto, K. and Kyojuka, J.** (2002). Overexpression of *RCN1* and  
707 *RCN2*, rice *TERMINAL FLOWER 1/CENTRORADIALIS* homologs, confers delay of phase  
708 transition and altered panicle morphology in rice. *Plant Journal* **29**, 743-750.

- 709           **Oikawa, T. and Kyojuka, J.** (2009). Two-step regulation of LAX PANICLE1 protein  
710 accumulation in axillary meristem formation in rice. *Plant Cell* **21**, 1095-1108.
- 711           **Pearce, S., Vanzetti, L. S. and Dubcovsky, J.** (2013). Exogenous gibberellins induce  
712 wheat spike development under short days only in the presence of *VERNALIZATION 1*. *Plant*  
713 *Physiology* **163**, 1433–1445.
- 714           **Preston, J. C., Christensen, A., Malcomber, S. T. and Kellogg, E. A.** (2009). MADS-  
715 box gene expression and implications for developmental origins of the grass spikelet. *American*  
716 *Journal of Botany* **96**, 1419-1429.
- 717           **Preston, J. C. and Kellogg, E. A.** (2006). Reconstructing the evolutionary history of  
718 paralogous *APETALAI/FRUITFULL*-like genes in grasses (Poaceae). *Genetics* **174**, 421-437.
- 719           **Preston, J. C. and Kellogg, E. A.** (2008). Discrete developmental roles for temperate  
720 cereal grass *VRNI/FUL*-like genes in flowering competency and the transition to flowering.  
721 *Plant Physiology* **146**, 265-276.
- 722           **Ratcliffe, O. J., Bradley, D. J. and Coen, E. S.** (1999). Separation of shoot and floral  
723 identity in Arabidopsis. *Development* **126**, 1109-1120.
- 724           **Ream, T. S., Woods, D. P., Schwartz, C. J., Sanabria, C. P., Mahoy, J. A., Walters,**  
725 **E. M., Kaeppler, H. F. and Amasino, R. M.** (2014). Interaction of photoperiod and  
726 vernalization determines flowering time of *Brachypodium distachyon*. *Plant Physiology* **164**,  
727 694-709.
- 728           **Shah, S., Karunarathna, N. L., Jung, C. and Emrani, N.** (2018). An *APETALAI*  
729 ortholog affects plant architecture and seed yield component in oilseed rape (*Brassica napus* L.).  
730 *BMC Plant Biol* **18**, 380.
- 731           **Shaw, L. M., Lyu, B., Turner, R., Li, C., Chen, F., Han, X., Fu, D. and Dubcovsky,**  
732 **J.** (2019). *FLOWERING LOCUS T2 (FT2)* regulates spike development and fertility in temperate  
733 cereals. *Journal of Experimental Botany* **70**, 193–204.
- 734           **Theissen, G., Melzer, R. and Rumpler, F.** (2016). MADS-domain transcription factors  
735 and the floral quartet model of flower development: linking plant development and evolution.  
736 *Development* **143**, 3259-3271.

- 737           **Tranquilli, G. and Dubcovsky, J.** (2000). Epistatic interactions between vernalization  
738 genes *Vrn-A<sup>m</sup>1* and *Vrn-A<sup>m</sup>2* in diploid wheat. *Journal of Heredity* **91**, 304-306.
- 739           **Trevaskis, B., Tadege, M., Hemming, M. N., Peacock, W. J., Dennis, E. S. and**  
740 **Sheldon, C.** (2007). *Short Vegetative Phase-like* MADS-box genes inhibit floral meristem  
741 identity in barley. *Plant Physiology* **143**, 225-235.
- 742           **Uauy, C., Paraiso, F., Colasuonno, P., Tran, R. K., Tsai, H., Berardi, S., Comai, L.**  
743 **and Dubcovsky, J.** (2009). A modified TILLING approach to detect induced mutations in  
744 tetraploid and hexaploid wheat. *BMC Plant Biology* **9**, 115-128.
- 745           **Wang, Y. G., Yu, H. P., Tian, C. H., Sajjad, M., Gao, C. C., Tong, Y. P., Wang, X. F.**  
746 **and Jiao, Y. L.** (2017). Transcriptome association identifies regulators of wheat spike  
747 architecture. *Plant Physiology* **175**, 746-757.
- 748           **Whipple, C. J.** (2017). Grass inflorescence architecture and evolution: the origin of  
749 novel signaling centers. *New Phytologist* **216**, 367-372.
- 750           **Williams, R. F. and Langer, R. H. M.** (1975). Growth and development of the wheat  
751 tiller. II. The dynamics of tiller growth. *Australian Journal of Botany* **23**, 745-759.
- 752           **Woods, D. P., McKeown, M. A., Dong, Y. X., Preston, J. C. and Amasino, R. M.**  
753 (2016). Evolution of *VRN2/Ghd7*-like genes in vernalization-mediated repression of grass  
754 flowering. *Plant Physiology* **170**, 2124-2135.
- 755           **Wu, F., Shi, X. W., Lin, X. L., Liu, Y., Chong, K., Theissen, G. and Meng, Z.** (2017).  
756 The ABCs of flower development: mutational analysis of *API/FUL*-like genes in rice provides  
757 evidence for a homeotic (A)-function in grasses. *Plant Journal* **89**, 310-324.
- 758           **Yan, L., Fu, D., Li, C., Blechl, A., Tranquilli, G., Bonafede, M., Sanchez, A.,**  
759 **Valarik, M. and Dubcovsky, J.** (2006). The wheat and barley vernalization gene *VRN3* is an  
760 orthologue of *FT*. *Proceedings of the National Academy of Sciences of the United States of*  
761 *America* **103**, 19581-19586.
- 762           **Yan, L., Loukoianov, A., Tranquilli, G., Helguera, M., Fahima, T. and Dubcovsky,**  
763 **J.** (2003). Positional cloning of wheat vernalization gene *VRN1*. *Proceedings of the National*  
764 *Academy of Sciences of the United States of America* **100**, 6263-6268.

765           **Zhang, X. K., Xia, X. C., Xiao, Y. G., Dubcovsky, J. and He, Z. H.** (2008). Allelic  
766 variation at the vernalization genes *Vrn-A1*, *Vrn-B1*, *Vrn-D1* and *Vrn-B3* in Chinese common  
767 wheat cultivars and their association with growth habit. *Crop Science* **48**, 458-470.

768

769

770 **FIGURE LEGENDS**

771 **Fig. 1. Effect of *VRN1*, *FUL2* and *FUL3* on stem length, leaf number and heading time.**

772 Kronos plants (*vrn2*-null background) grown under long-day photoperiod. Stem length was  
773 determined from the base of the plant to the base of the spike. (A) Stem length in cm (n= 6-12).  
774 (B) Number of true leaves (n= 6-12). Alleles in red indicate homozygous null mutants and alleles  
775 in black homozygous wild type alleles. (C) *P* values from three-way ANOVAs for stem length  
776 and leaf number including all eight homozygous *VRN1*, *FUL2* and *FUL3* allele combinations (n=  
777 59). \* =  $P < 0.05$ , \*\* =  $P < 0.01$ , \*\*\* =  $P < 0.001$ , \*\*\*\* =  $P < 0.0001$ , NS =  $P > 0.05$ . (D)  
778 Heading time of *vrn1*-null (n=6) versus control (n= 6). (E) Heading time of *ful2ful3*-null (n= 15)  
779 vs. control (n= 10) in a *Vrn1* background. D and E are separate experiments. Error bars are SEM.

780 **Fig. 2. Phenotypical characterization of the *vrn1ful2* and *vrn1ful2ful3* mutants.** (A) Stems

781 and heads of *vrn1*-null, *vrn1ful2*-null and *vrn1ful2ful3*-null mutants (leaves were removed before  
782 photography). (B) Rachis of the different mutants. Arrows indicate the position of the first  
783 spikelet before removal. (C-G) *vrn1ful2*-null mutant. (C) Spike-like structure. Arrow points to  
784 the bract subtending a basal inflorescence tiller. (D) Spike-like structure after removal of the  
785 inflorescence tillers to show subtending bracts (arrows). (E) Dissection of an inflorescence tiller  
786 showing two glumes and one lemma partially transformed into leaves, followed by four leaves.  
787 The inset with yellow border shows the meristem transition into an IM with lateral VMs. (F)  
788 Detail of white rectangle in (E) revealing an ovary, two anthers, and leafy-lemma and palea. (G)  
789 Leafy palea and lodicules subtending one anther and two ovaries. (H-J) *vrn1ful2ful3*-null mutant.  
790 (H) Normal leaves L11 to L18 with no axillary buds. L19 marks the beginning of the spike-like  
791 structure in which spikelets have been replaced by tillers subtended by leaves (L19 and L20) or  
792 bracts. (I and J) Detail of the tillers subtended by L19 (I) and L20 (J). Insets in white rectangles  
793 are the SAM of these tillers (transitioning into IM with lateral VM) and the yellow rectangle  
794 presents the exhausted IM.

795 **Fig. 3. Scanning Electron Microscopy (SEM) images.** (A-C) Early double-ridge stage (D-I) Later

796 stage showing the fate of the lateral meristems. (A) Kronos control (D, G) *vrn1*-null control. Red  
797 arrows indicated the repressed lower ridge, and red dots the upper ridges that develop into  
798 normal spikelets (D and G). (B, E, H) *vrn1ful2*-null mutants. Yellow arrows indicate the partially

799 repressed lower ridges that develop into bracts (see Fig. 2D) and yellow dots indicate the upper  
800 ridges that develop into intermediate meristems that generate tiller-like structures with altered  
801 floral organs (see Fig. 2E-G). (C, F, I) *vrn1ful2ful3*-null mutants. Green arrows indicate basal  
802 lower ridges that develop into normal leaves (see Fig. 2H) and green dots indicate upper ridges  
803 that produce lateral vegetative meristems that generate vegetative tillers with no floral organs  
804 (see Fig. 2 I-J). Bar = 200  $\mu$ m.

805 **Fig. 4. *VRN1* and *FUL2* play redundant roles in the control of spike determinacy and**  
806 **spikelet number.** (A) Scanning Electro-Microscopy of a normal wheat spike with a terminal  
807 spikelet in *vrn1*-null. (B) *vrn1ful2*-null mutant spike with indeterminate apical meristem. (C-E)  
808 Number of spikelets per spike in a growth chamber experiment (n=6). (C) *vrn1*-null (58%  
809 increase), (D) *ful2*-null (10% increase) and (E) *ful3*-null (no significant increase). Bars represent  
810 mean  $\pm$  SEM and asterisks indicate statistically significant difference to the control line (\*\* =  $P$   
811 < 0.01, \*\*\* =  $P$  < 0.001, NS =  $P$  > 0.05). (F) ANOVAs for spike traits in *ful2*-null and sister  
812 control lines in the field (randomized complete block design with 8 blocks).

813

814 **SUPPLEMENTARY TABLES**

815 **Table S1.** Primers used for genotyping the *ful2*, *ful3*, *vrn1* and *vrn2*-null mutants.

816 **Table S2.** Primers used in the real time Q-PCR experiments.

817 **Table S3.** Three-way ANOVA for heading time.

818

819 **SUPPLEMENTARY FIGURES**

820 **Fig. S1.** Phylogeny of duplicated Arabidopsis AP1/CAL/FUL and grasses VRN1/FUL2/FUL3  
821 proteins.

822 **Fig. S2.** Selected *ful2* and *ful3* mutations and their effect on the encoded proteins.

823 **Fig. S3.** Time course of shoot apical meristem (SAM) elongation and transition to the  
824 reproductive stage in *FUL2* and *FUL3* mutants in a *vrn1*-null background.

825 **Fig. S4.** Effect of *Ubi::FUL2* and *Ubi::FUL3* on heading time.

826 **Fig. S5.** *FTI* transcript levels in leaves.

827 **Fig. S6.** Phenotypical characterization of heterozygous mutants containing one copy of *VRN1* or  
828 *FUL2*.

829 **Fig. S7.** Transcript levels of wheat *SVP*-like MADS-box genes *VRT2*, *BM1* and *BM10*.

830 **Fig. S8.** Effect of the overexpression of *FUL2* and *FUL3* on the number of spikelets per spike.

831 **Fig. S9.** Transcript levels of wheat *TFL1/CEN*-like genes *CEN2*, *CEN4* and *CEN5*.

832 **Fig. S10.** Effect of *ful2*-null and *ful3*-null on the number of florets per spikelet.

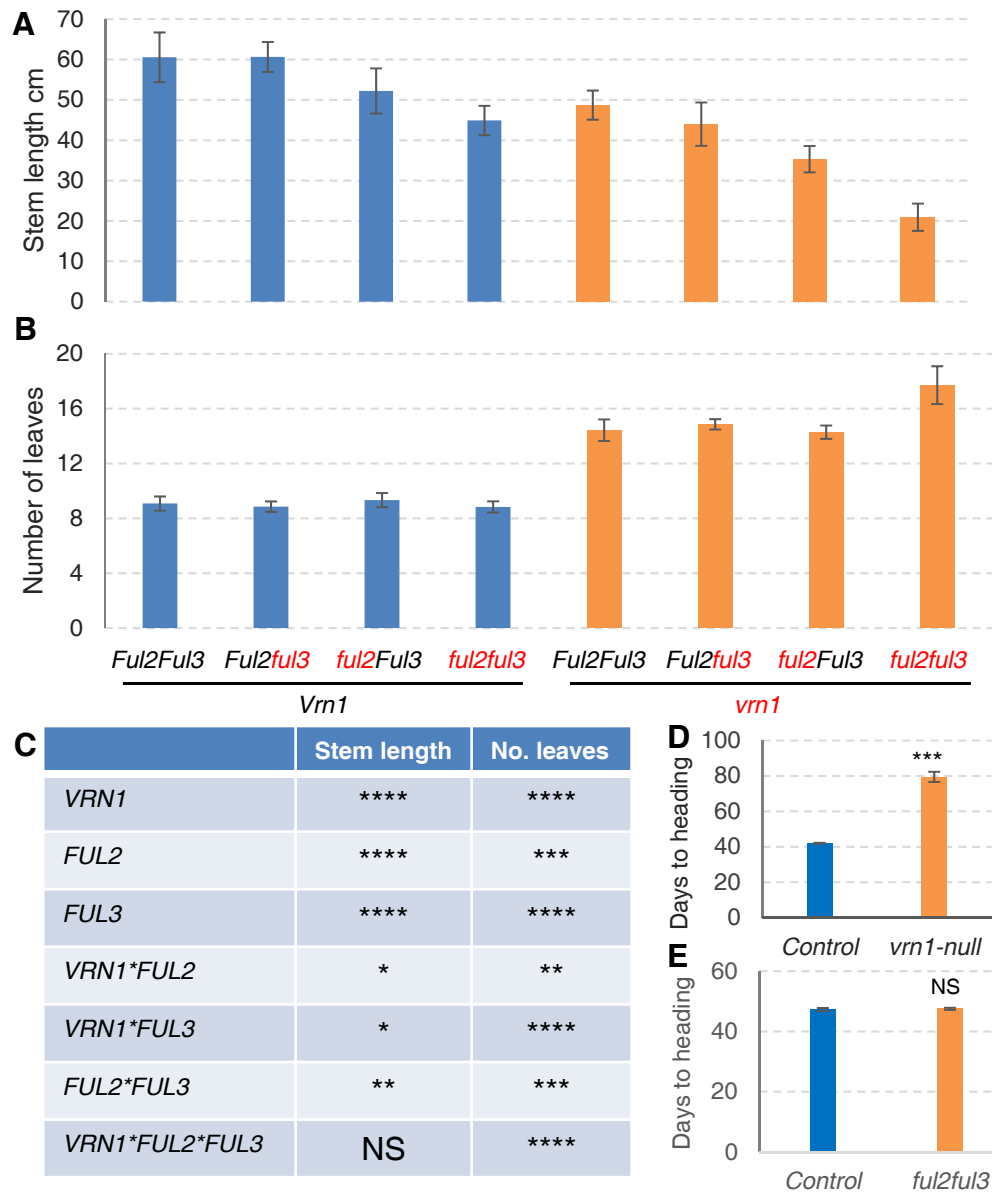

**Fig. 1**



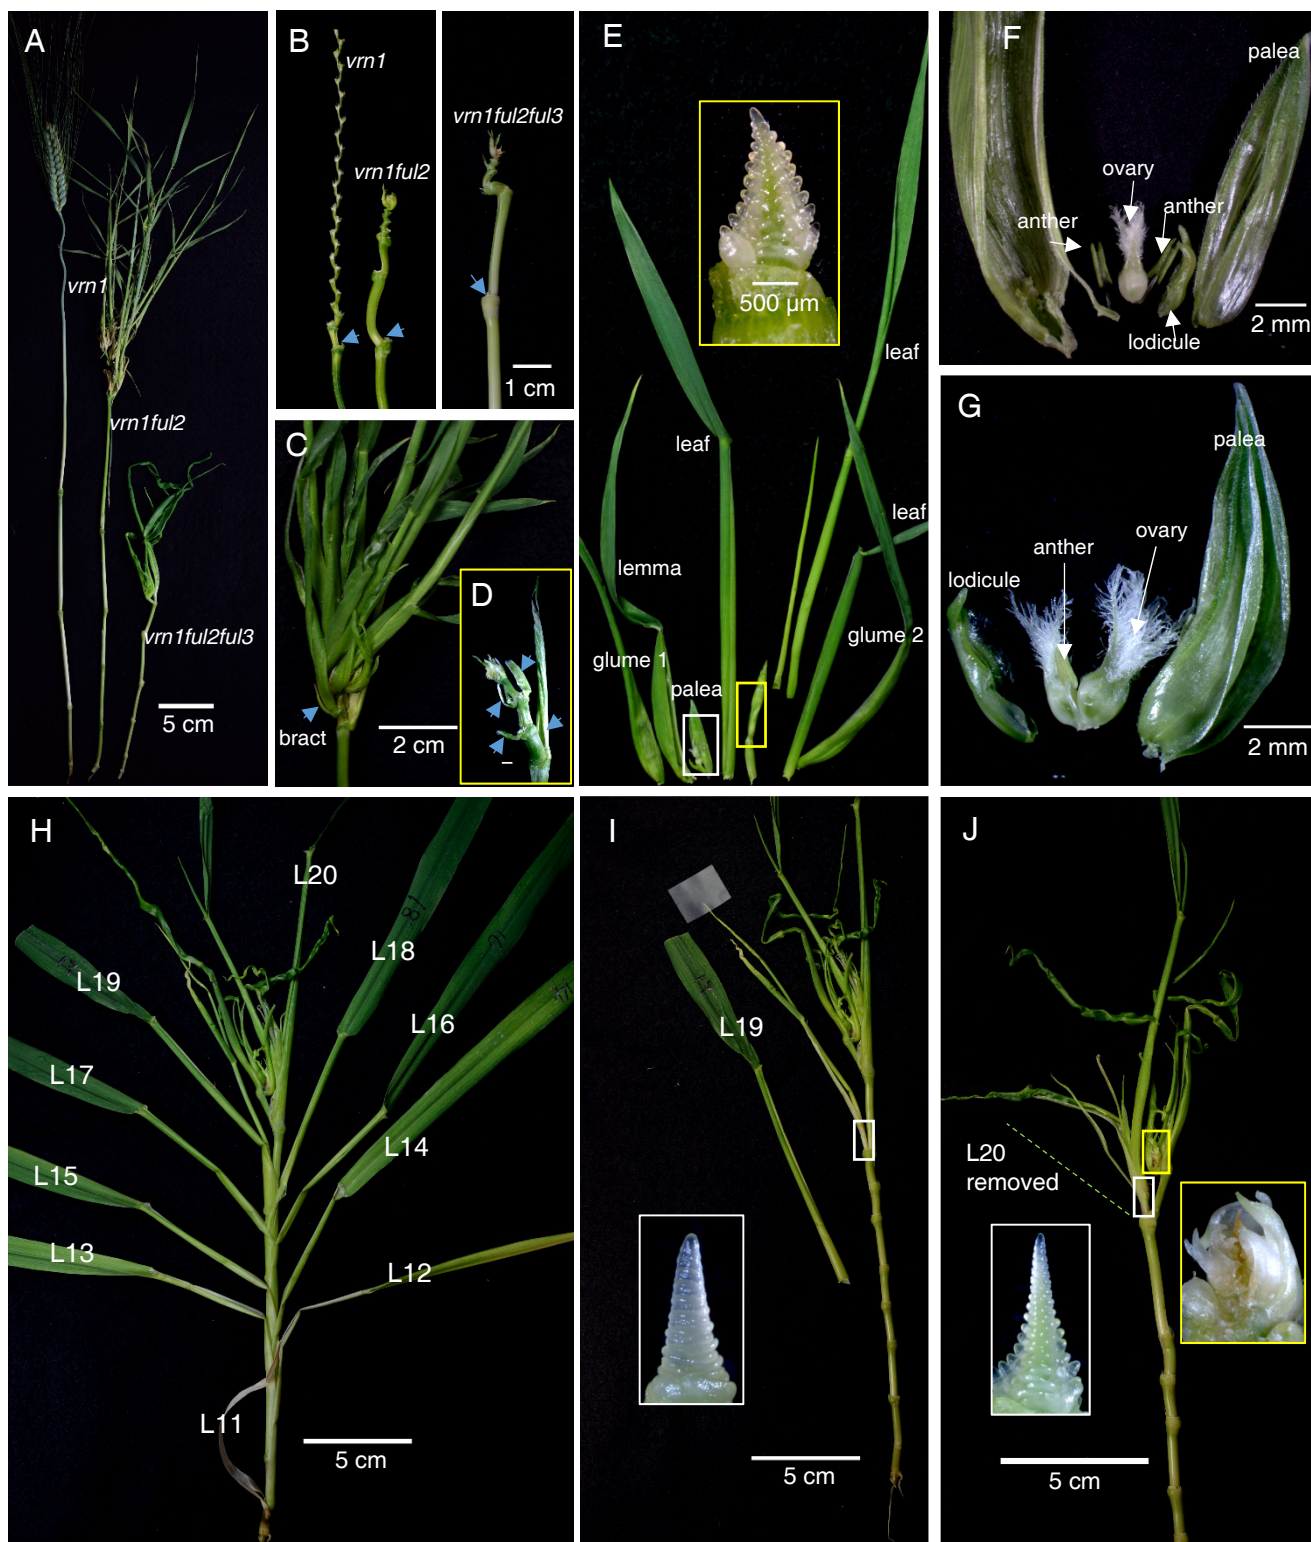

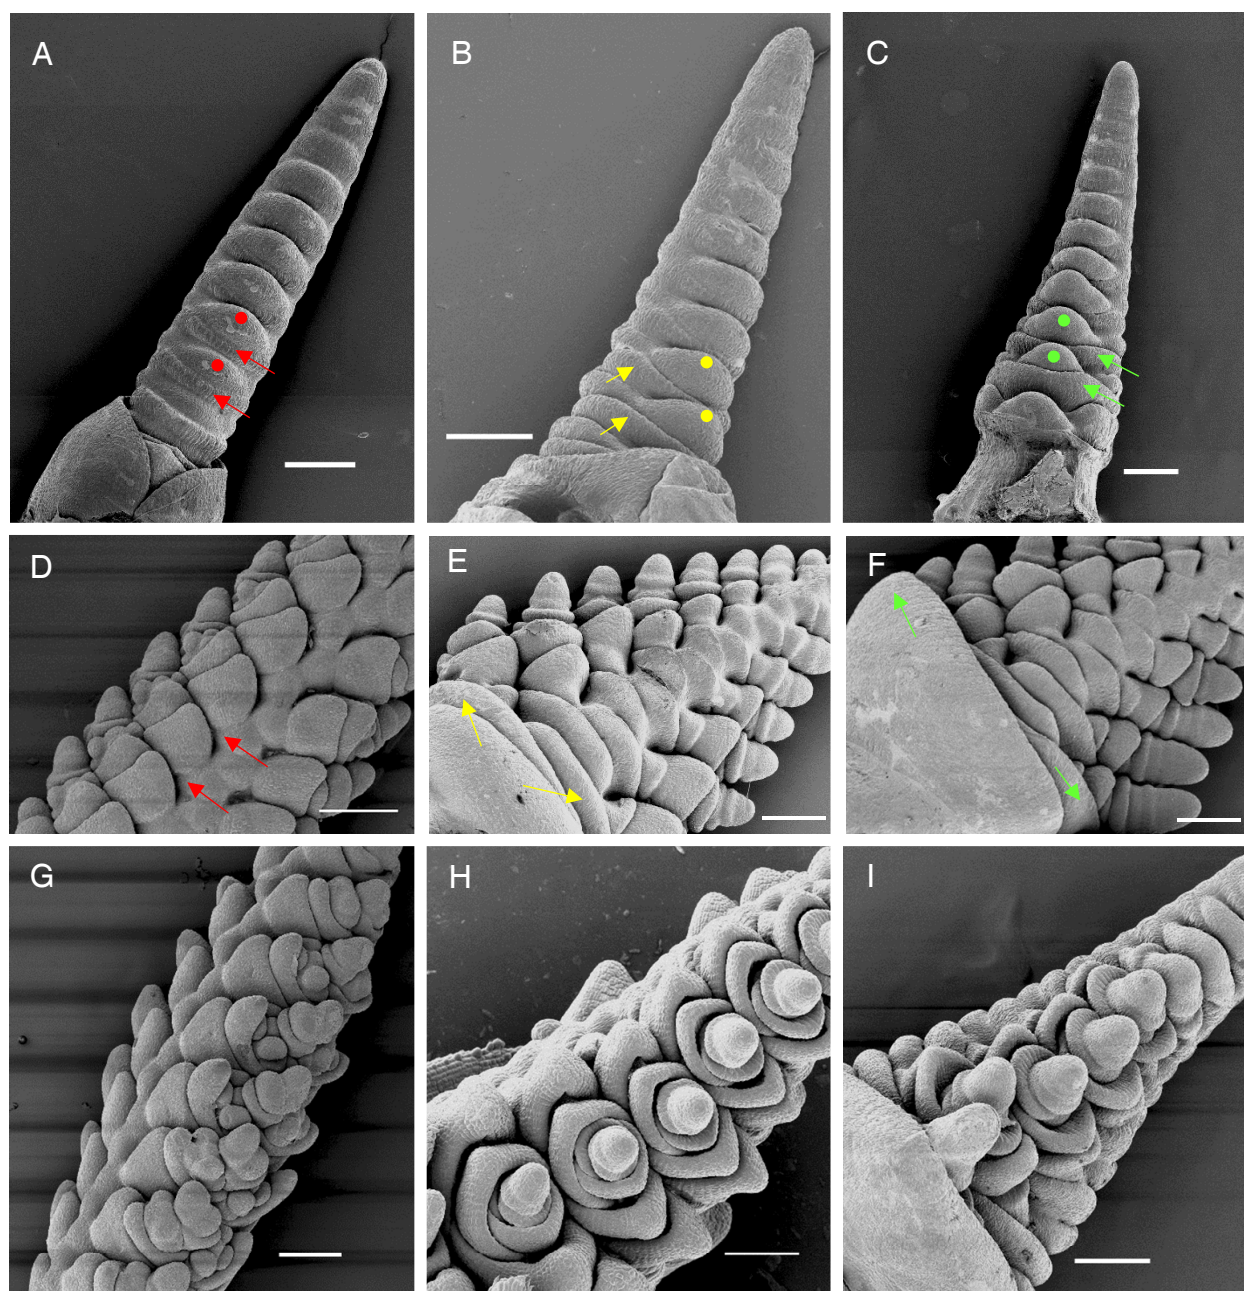

**Fig. 3.**

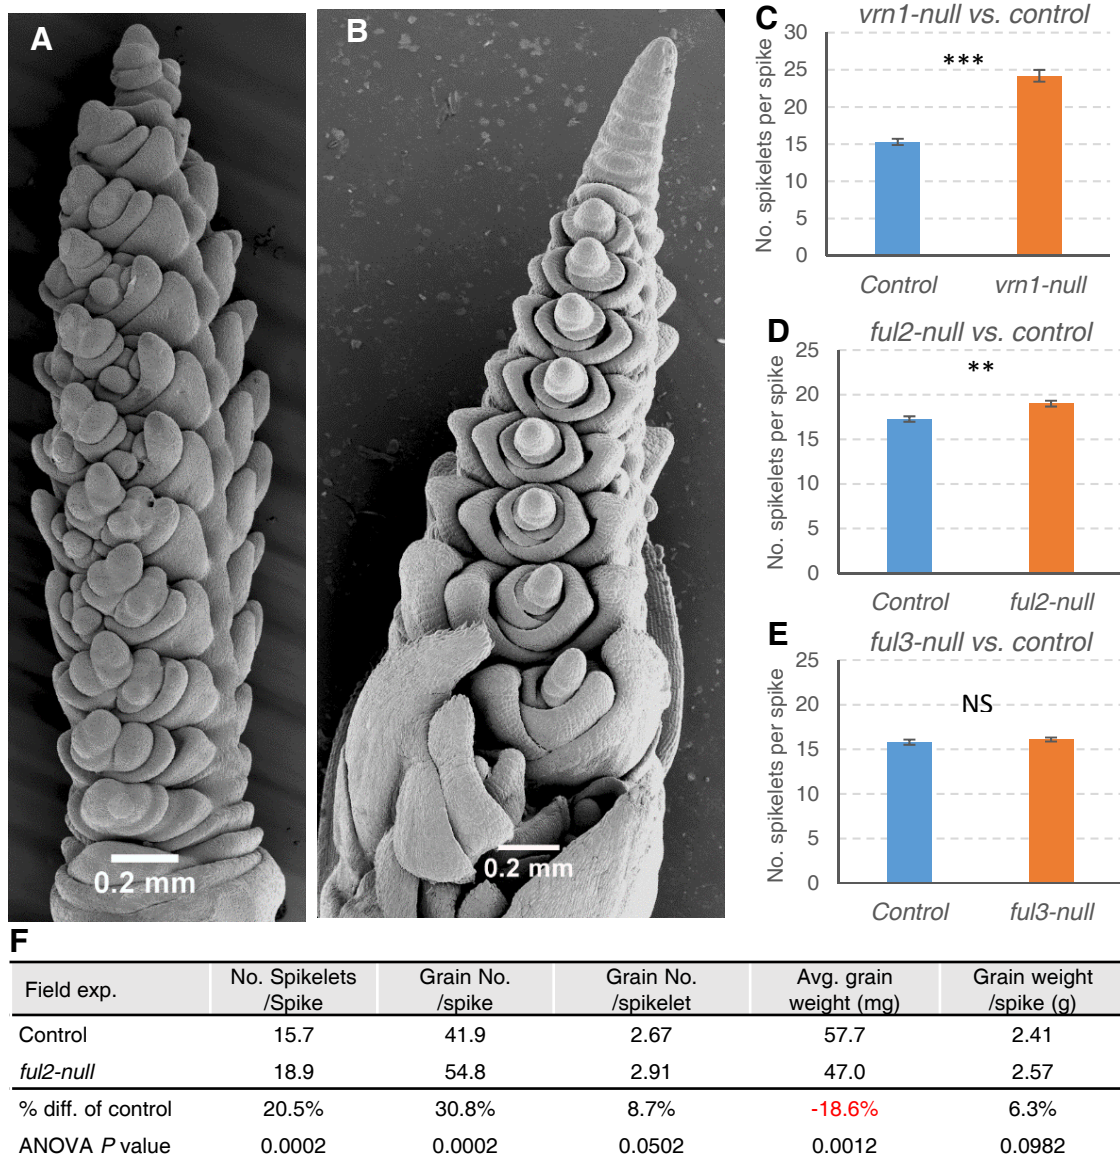

**Fig. 4**
